# Supplementary material for: A highly efficient polydopamine encapsulated clinical ICG theranostic nanoplatform for enhanced photothermal therapy of cervical cancer
Source: Royal Society of Chemistry journal article supplement (doi:10.1039/d2na00341d), 2022-01-01
Supplement: d2na00341d1.pdf [file d2na00341d1.pdf]

## Electronic Supplementary Information

### High efficient polydopamine encapsulated clinical ICG theranostic nanoplatform for enhanced photothermal therapy of cervical cancer

Zhong Du,<sup>1a</sup> Rong Ma,<sup>1a</sup> Shuang Chen,<sup>a</sup> Huimin Fan,<sup>b</sup> Youqiang Heng,<sup>a</sup> Ting Yan,<sup>b</sup> Gulinigaer Alimu,<sup>b</sup> Lijun Zhu,<sup>b</sup> Xueliang Zhang,<sup>b</sup> Nuernisha Alifu <sup>\*b</sup> and Cailing Ma <sup>\*a</sup>

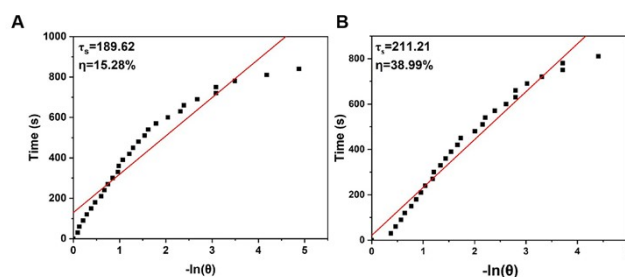

**Fig. S1** (A) Linear fitting of time data versus  $-\ln \theta$  and the  $\eta$  of free ICG. ( $125 \mu\text{g mL}^{-1}$ , NIR laser was  $808 \text{ nm}$ ,  $0.8 \text{ W cm}^{-2}$ ). (B) Linear fitting of time data versus  $-\ln \theta$  and the  $\eta$  of free PDA. ( $125 \mu\text{g mL}^{-1}$ , NIR laser was  $808 \text{ nm}$ ,  $0.8 \text{ W cm}^{-2}$ ).

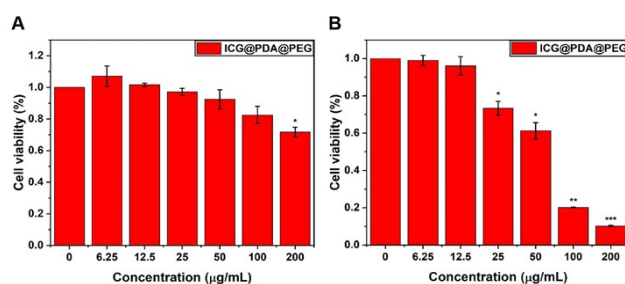

**Fig. S2** (A) Cell viability of H8 cells incubated with different concentrations ( $0, 6.25, 12.5, 25, 50, 100$  and  $200 \mu\text{g mL}^{-1}$ ) of ICG@PDA@PEG NPs for 24 hours. (B) Cell viability of HeLa cells incubated with different concentrations ( $0, 6.25, 12.5, 25, 50, 100$  and  $200 \mu\text{g mL}^{-1}$ ) of ICG@PDA@PEG NPs for 24 hours, and then irradiated with  $808 \text{ nm}$  laser irradiation ( $0.8 \text{ W cm}^{-2}$ ) for 15 minutes. The data are shown as mean  $\pm$  SD.  $n = 3$  per group, NS, no significance,  $*p < 0.05$ ,  $**p < 0.01$ ,  $***p < 0.001$ .

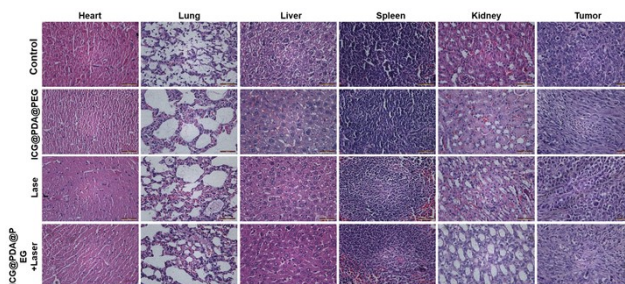

**Fig. S3** Representative histological images of major organs and tumor samples of mice from the Control group, ICG@PDA@PEG NPs group, Laser group, ICG@PDA@PEG NPs + Laser group.
